# Supplementary material
Source: PubMed Central journal article supplement (PMC9117780)
Supplement: sj-pdf-1-hpx-10.1177_00185787211016339.pdf [file sj-pdf-1-hpx-10.1177_00185787211016339.pdf]

**Supplemental Table 1. Product Concentrations per Site**

| <b>Agent</b>            | <b>Institution 1</b>                      | <b>Institution 2</b>     | <b>Institution 3</b>               |
|-------------------------|-------------------------------------------|--------------------------|------------------------------------|
| Antibacterials          |                                           |                          |                                    |
| Vancomycin              | 5 mg/mL                                   | 4 mg/mL                  | 3.5 – 6 mg/mL<br>depending on dose |
| Piperacillin-tazobactam | 33.75 mg/mL<br>45 mg/mL                   | 37.5mg/mL                | 33.75 mg/mL                        |
| Cefepime                | 10 mg/mL                                  | 10 mg/mL                 | 1 gm/10 mL IV push                 |
| Metronidazole           | 5 mg/mL                                   | 10 mg/mL                 | 5 mg/mL                            |
| VME                     |                                           |                          |                                    |
| Potassium chloride      | 0.1 mEq/mL<br>0.2 mEq/mL                  | 0.1 mEq/mL<br>0.2 mEq/mL | 0.1 mEq/mL<br>0.4 mEq/mL           |
| Sodium phosphate        | .14 mmol/mL<br>.12 mmol/mL<br>.17 mmol/mL | 0.06 mmol/mL             | 0.03 – 0.12 mmol/mL                |
| Magnesium               | 10 mg/mL<br>40 mg/mL                      | 10 mg/mL                 | 10 mg/mL<br>40 mg/mL               |
| Vasoactive agents       |                                           |                          |                                    |
| Norepinephrine          | 64 mcg/mL                                 | 32 mcg/mL                | 16 mcg/mL<br>64 mcg/mL             |
| Vasopressin             | 1 unit/mL                                 | 0.4 units/mL             | 0.4 units/mL                       |
| Nicardipine             | 0.2 mg/mL                                 | 0.1 mg/mL                | 0.2 mg/mL                          |
| PAD agents              |                                           |                          |                                    |

|                                     |             |             |                                           |
|-------------------------------------|-------------|-------------|-------------------------------------------|
| Propofol                            | 10 mg/mL    | 10 mg/mL    | 10 mg/mL                                  |
| Dexmedetomidine                     | 4 mcg/mL    | 4 mcg/mL    | 4 mcg/mL                                  |
| Anticoagulants & sodium bicarbonate |             |             |                                           |
| Heparin                             | 50 units/mL | 50 units/mL | 50 units/mL                               |
| Sodium bicarbonate                  | 0.15 mEq/mL | 0.15 mEq/mL | 0.075 mEq/mL<br>0.1 mEq/mL<br>0.15 mEq/mL |

VME = Vitamins/Minerals/Electrolytes

PAD = Pain/Agitation/Delirium
